# Supplementary material for: Environment-Dependent Heterosis and Transgressive Gene Expression in Reciprocal Hybrids between the Channel Catfish Ictalurus punctatus and the Blue Catfish Ictalurus furcatus
Source: MDPI journal article supplement (doi:10.3390/biology11010117), 2022-01-12

**Table S1. Comparison of morphometric measurements for blue catfish, channel catfish, and their reciprocal hybrids in the tank environment.**

|                             | Channel                 | Blue                    | B×C hybrid               | C×B hybrid              | F-value | Heterosis |        | Heterobeltiosis |        |
|-----------------------------|-------------------------|-------------------------|--------------------------|-------------------------|---------|-----------|--------|-----------------|--------|
|                             |                         |                         |                          |                         |         | B×C       | C×B    | B×C             | C×B    |
| <b>Total length (cm)</b>    | 17.25±1.03 <sup>c</sup> | 12.06±0.25 <sup>a</sup> | 14.15±0.66 <sup>b</sup>  | 14.03±0.92 <sup>b</sup> | 40.88** | -3.45     | -4.26  | -17.97          | -18.67 |
| <b>Standard length (cm)</b> | 14.40±0.96 <sup>b</sup> | 10.66±0.21 <sup>a</sup> | 11.58±0.71 <sup>a</sup>  | 11.58±0.87 <sup>a</sup> | 25.78** | -7.58     | -7.58  | -19.58          | -19.58 |
| <b>Head length (cm)</b>     | 3.27±0.39 <sup>b</sup>  | 2.44±0.09 <sup>a</sup>  | 2.40±0.15 <sup>a</sup>   | 2.51±0.14 <sup>a</sup>  | 18.77** | -15.94    | -12.08 | -26.61          | -23.24 |
| <b>Head width (cm)</b>      | 2.15±0.20 <sup>b</sup>  | 1.70±0.12 <sup>a</sup>  | 1.67±0.09 <sup>a</sup>   | 1.68±0.15 <sup>a</sup>  | 14.77** | -13.25    | -12.73 | -22.33          | -21.86 |
| <b>Head depth (cm)</b>      | 2.27±0.20 <sup>b</sup>  | 1.70±0.12 <sup>a</sup>  | 1.77±0.10 <sup>a</sup>   | 1.89±0.17 <sup>a</sup>  | 15.02** | -10.83    | -4.79  | -22.03          | -16.74 |
| <b>Body depth (cm)</b>      | 2.83±0.65               | 2.38±0.08               | 2.43±0.10                | 2.43±0.33               | 1.79    | -6.72     | -6.72  | -14.13          | -14.13 |
| <b>Caudal depth (cm)</b>    | 1.26±0.10 <sup>b</sup>  | 0.92±0.04 <sup>a</sup>  | 0.94±0.05 <sup>a</sup>   | 1.02±0.08 <sup>a</sup>  | 25.59** | -13.76    | -6.42  | -25.4           | -19.05 |
| <b>Weight (g)</b>           | 41.33±8.31 <sup>c</sup> | 14.40±1.52 <sup>a</sup> | 19.50±3.62 <sup>ab</sup> | 23.33±4.37 <sup>b</sup> | 29.01** | -30.02    | -16.27 | -52.82          | -43.55 |

Significance of one-way ANOVA: \*:  $P < 0.05$ ; \*\*:  $P < 0.01$ . Values in the same column having the same superscripts are not significantly different (Tukey's test,  $P > 0.05$ ). Channel: channel catfish; Blue: blue catfish; B×C hybrid: female blue catfish × male channel catfish; C×B hybrid: female channel catfish × male blue catfish.

$$\text{Heterosis} = \frac{\bar{F}_1 - \text{MPV}}{\text{MPV}} \times 100$$

$$\text{Heterobeltiosis} = \frac{\bar{F}_1 - \text{BPV}}{\text{BPV}} \times 100$$

Where:  $\bar{F}_1$  average of F1 hybrid; BPV: Better Parent Value; MPV: Mid Parent Value (P1+P2)/2.

**Table S2. Biochemical and immunological assays in blue catfish, channel catfish, and their reciprocal hybrids cultured in the tank environment.**

|                  | <b>Blue catfish</b>           | <b>Channel catfish</b>       | <b>C×B hybrid</b>             | <b>B×C hybrid</b>             |
|------------------|-------------------------------|------------------------------|-------------------------------|-------------------------------|
| Lactate (mmol/L) | 3.599 ± 0.811 <sup>a</sup>    | 6.263 ± 1.173 <sup>b</sup>   | 7.168 ± 1.375 <sup>b</sup>    | 8.104 ± 1.444 <sup>b</sup>    |
| Glucose (mg/dl)  | 98.385 ± 18.741 <sup>a</sup>  | 96.788 ± 25.282 <sup>a</sup> | 172.462 ± 35.578 <sup>b</sup> | 133.615 ± 19.666 <sup>a</sup> |
| Lysozyme (µg/mL) | 3.872 ± 0.7 <sup>a</sup>      | 0.160 ± 0.086 <sup>b</sup>   | 0.378 ± 0.102 <sup>b</sup>    | 0.935 ± 0.427 <sup>b</sup>    |
| ACH50 (units/mL) | 76.179 ± 22.325 <sup>ac</sup> | 6.820 ± 1.496 <sup>b</sup>   | 43.979 ± 13.584 <sup>c</sup>  | 46.596 ± 9.410 <sup>c</sup>   |

Note: values in the same row having the same superscripts are not significantly different (Tukey's test,  $P > 0.05$ ). B×C hybrid: female blue catfish × male channel catfish; C×B hybrid: female channel catfish × male blue catfish.

**Table S3. Liver sample RNA sequencing yield, quality control, and alignment statistics.**

| <b>Sample ID</b> | <b>Sample name</b>    | <b>Body weight at collection</b> | <b>Raw reads</b> | <b>Filtered reads</b> | <b>Mapping rate to channel genome</b> | <b>Mapping rate to blue genome</b> |
|------------------|-----------------------|----------------------------------|------------------|-----------------------|---------------------------------------|------------------------------------|
| CxC_C58_indiv1   | Channel catfish liver | 47.6 g                           | 74,645,394       | 72,939,430            | 79.6%                                 | 37.4%                              |
| CxC_C58_indiv2   | Channel catfish liver | 52.5 g                           | 79,057,946       | 76,881,484            | 79.3%                                 | 29.7%                              |
| BxB_C57_indiv1   | Blue catfish liver    | 20.2 g                           | 89,934,258       | 87,650,476            | 37.3%                                 | 84.1%                              |
| BxB_C57_indiv2   | Blue catfish liver    | 18.6 g                           | 67,639,738       | 66,215,758            | 42.0%                                 | 81.9%                              |
| BxC_C66_indiv1   | B×C hybrid liver      | 29.0 g                           | 92,917,484       | 90,536,414            | 57.6%                                 | 68.1%                              |
| BxC_C66_indiv2   | B×C hybrid liver      | 32.2 g                           | 91,926,868       | 90,204,272            | 65.2%                                 | 71.2%                              |
| CxB_C56_indiv1   | C×B hybrid liver      | 23.5 g                           | 100,242,864      | 97,806,146            | 66.9%                                 | 55.6%                              |
| CxB_C56_indiv2   | C×B hybrid liver      | 26.8 g                           | 93,576,928       | 90,995,214            | 50.6%                                 | 60.4%                              |

**Table S4. Numbers of significantly differentially expressed genes (DEGs) in pairwise comparisons among four genetic backgrounds (PB, PC, F<sub>1</sub>BC, and F<sub>1</sub>CB.).**

|                                         | Number of DEGs | Upregulated | Downregulated |
|-----------------------------------------|----------------|-------------|---------------|
| PC vs. PB                               | 2,307          | 1,346       | 961           |
| PB vs. F <sub>1</sub> BC                | 665            | 326         | 339           |
| PB vs. F <sub>1</sub> CB                | 598            | 266         | 332           |
| PC vs. F <sub>1</sub> BC                | 458            | 289         | 169           |
| PC vs. F <sub>1</sub> CB                | 810            | 484         | 326           |
| F <sub>1</sub> BC vs. F <sub>1</sub> CB | 98             | 50          | 48            |

**Table S5. List of primer sequences for quantitative reverse transcription PCR validation.**

| Gene name         | 5' - 3' primer sequence  | PCR product size (bp) |
|-------------------|--------------------------|-----------------------|
| <i>Cyp2k19</i> -F | GGCCAAGTACCCTCACATACAGG  | 154                   |
| <i>Cyp2k19</i> -R | ACTCATGGGTACTATATTTGCCAG |                       |
| <i>Fgflb</i> -F   | ATCATCAGAGGTCACGAGGC     | 166                   |
| <i>Fgflb</i> -R   | CGTACCAGACCCCGTGCTC      |                       |
| <i>Hmox</i> -F    | GTCGCACCAATTTACTTCCCT    | 234                   |
| <i>Hmox</i> -R    | GGTAATTCGGCCCAACACC      |                       |
| <i>Irf7</i> -F    | TATGATTTGCCAAACCACATGC   | 170                   |
| <i>Irf7</i> -R    | ACAGTCATGTTATTCGGAAGG    |                       |
| <i>Cregl</i> -F   | CAAGCACAAAGGTTACGACCC    | 210                   |
| <i>Cregl</i> -R   | CCTCCGAAGTAGTCCAACACC    |                       |
| <i>Tm4sf4</i> -F  | AGCTGGTTATTCTTTTCATCGT   | 217                   |
| <i>Tm4sf4</i> -R  | CAGAGCCATTTGAACCATGC     |                       |

**Figure S1. Morphometric measurements of channel catfish (C), *Ictalurus punctatus*, blue catfish (B), *I. furcatus*, and their reciprocal F1 hybrids raised in the tank environment, standardized by total length (TL).**

Morphometric traits normalized by total length for the four genetic cross types: channel catfish (C) parental cross (PC), blue catfish (B) parental cross (PB), blue catfish female  $\times$  channel catfish male hybrids (F<sub>1</sub>BC), and channel catfish female  $\times$  blue catfish male hybrids (F<sub>1</sub>CB). (A), body length; (B), body depth; (C), head length; (D), head width; (E), head depth; (F), caudal depth. Statistical significance was assessed by the nonparametric Mann-Whitney U test. (\*, adjusted  $P$ -value  $< 0.05$ ).

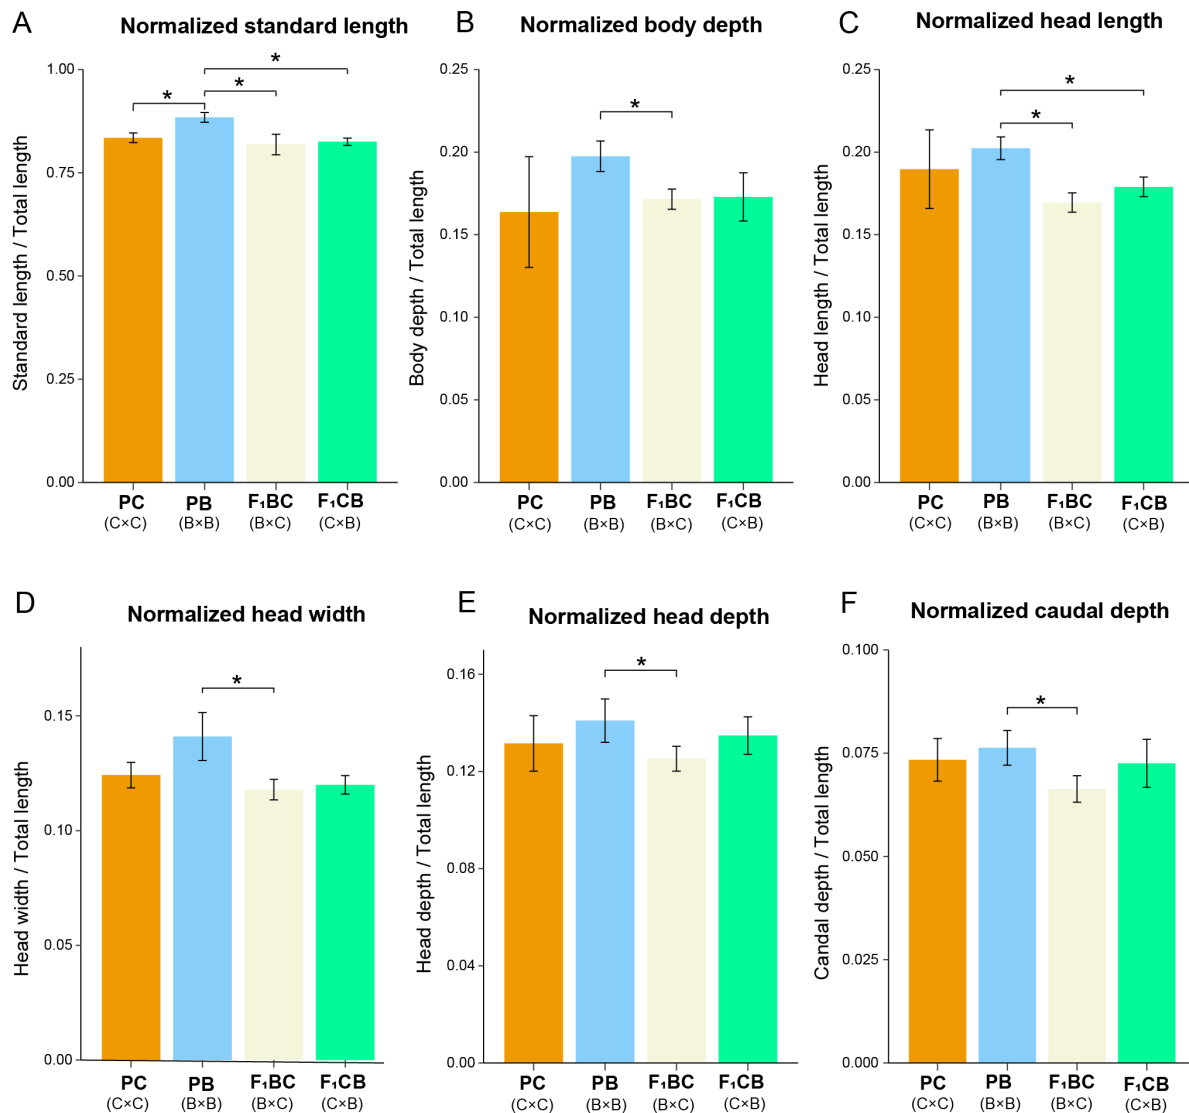

**Figure S2. Radar plot of seven body metrics in channel catfish (C), *Ictalurus punctatus*, blue catfish (B), *I. furcatus*, and their reciprocal F<sub>1</sub> hybrids raise in the tank environment.**

Radar chart for seven body measurements (total length, body length, head length, head width, head depth, caudal depth) in channel catfish (C) parental cross (PC), blue catfish (B) parental cross (PB), blue catfish female  $\times$  channel catfish male hybrids (F<sub>1</sub>BC), and channel catfish female  $\times$  blue catfish male hybrids (F<sub>1</sub>CB). The channel measurement area is shaded in orange.

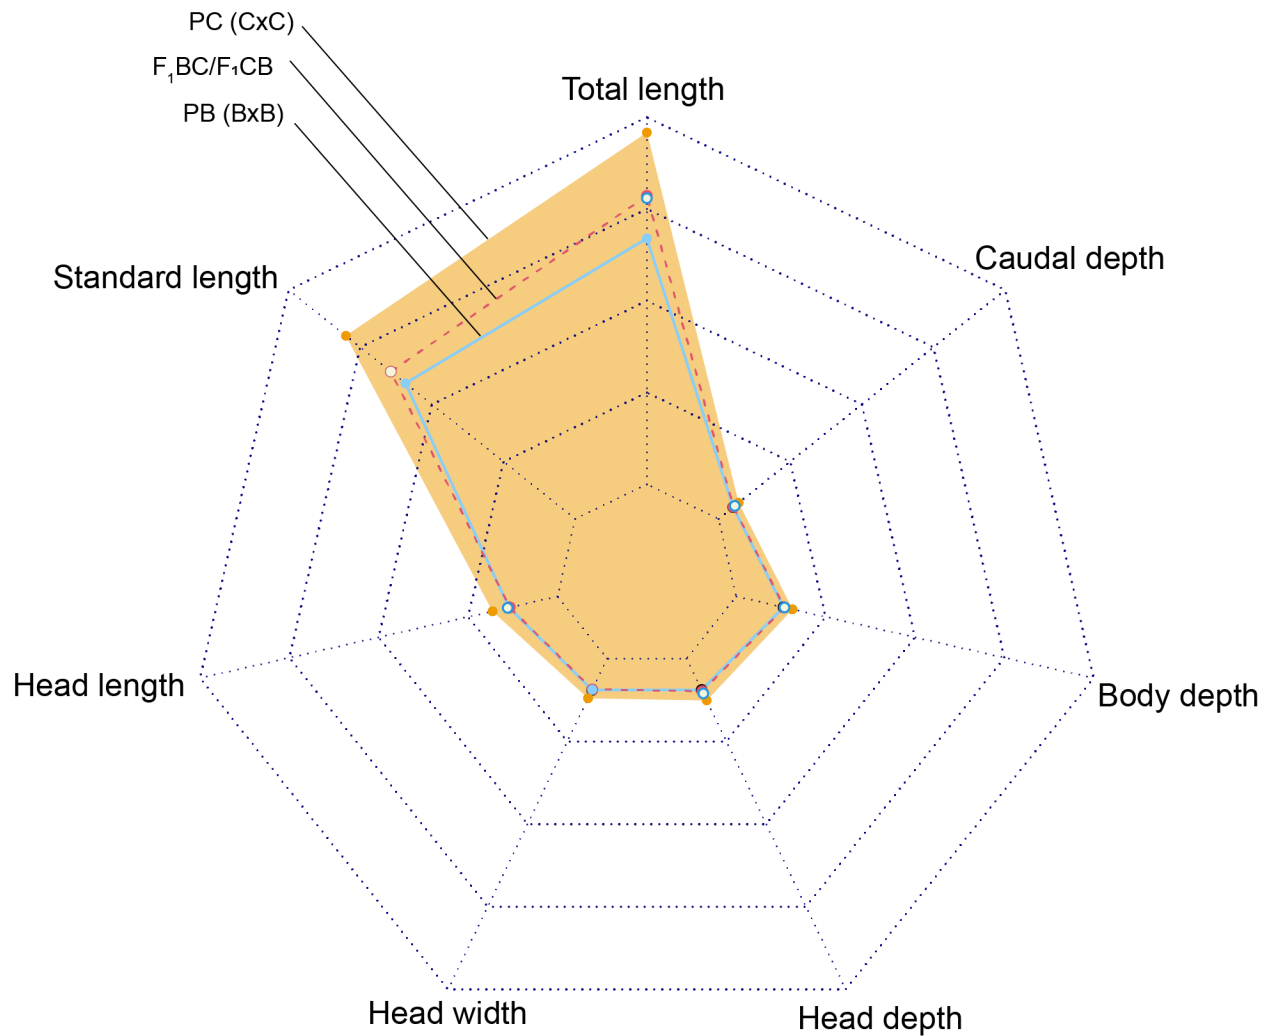

Supplement: s1 [file s1]
